# Supplementary material for: Chemical Characteristics of Precipitation in a Typical Urban Site of the Hinterland in Three Gorges Reservoir, China
Source: Hindawi journal article supplement (doi:10.1155/2018/2914313), 2018-01-01
Supplement: f1 [file 2914313.f1.docx]

**Chemical characteristics of precipitation in a typical urban site of the hinterland in Three Gorges Reservoir, China­**

Liuyi Zhang, Baoqing Qiao, Huanbo Wang, Mi Tian, Jian Cui, Chuan Fu, Yimin Huang, Fumo Yang

**Table S1) Monthly data of ionic concentration of precipitation, mass concentration of particulate matter, and meteorological factors in Wanzhou.**

| Month | pH | EC  (μS cm–1) | F– (ueq L–1) | Cl– (ueq L–1) | NO3– (ueq L–1) | SO42– (ueq L–1) | K+  (ueq L–1) | Na+   (ueq L–1) | Ca2+   (ueq L–1) | Mg2+   (ueq L–1) | NH4+   (ueq L–1) | PM10  (ug m–3) | PM2.5  (ug m–3) | Rainfall  amount (mm) | Wind speed  (m s–1) | Wind direction  (°) |
| --- | --- | --- | --- | --- | --- | --- | --- | --- | --- | --- | --- | --- | --- | --- | --- | --- |
| Jan-14 | 4.26 | 72.14 | 0.76 | 1.11 | 5.85 | 15.11 | 25.10 | 34.77 | 115.46 | 17.06 | 192.63 | 167.10 | 118.40 | 9.30 | 0.67 | 152.65 |
| Feb-14 | 4.49 | 65.66 | 0.18 | 0.84 | 2.69 | 14.05 | 25.59 | 31.72 | 72.21 | 10.95 | 159.88 | 96.40 | 64.10 | 4.10 | 0.83 | 122.33 |
| Mar-14 | 4.57 | 30.86 | 2.12 | 7.14 | 27.34 | 151.23 | 11.03 | 20.11 | 54.97 | 8.00 | 79.99 | 94.30 | 57.40 | 58.40 | 0.84 | 124.91 |
| Apr-14 | 4.95 | 28.24 | 2.17 | 7.91 | 34.28 | 180.74 | 9.85 | 11.92 | 60.68 | 9.47 | 74.72 | 62.60 | 37.00 | 135.40 | 0.85 | 124.58 |
| May-14 | 5.74 | 31.69 | 1.20 | 86.59 | 27.62 | 151.07 | 41.25 | 7.52 | 45.17 | 7.20 | 73.65 | 83.40 | 46.40 | 117.00 | 0.80 | 129.81 |
| Jun-14 | 5.08 | 23.47 | 2.05 | 16.55 | 36.53 | 182.54 | 6.42 | 4.70 | 24.10 | 2.85 | 53.33 | 79.90 | 49.80 | 208.00 | 0.83 | 124.59 |
| Jul-14 | 6.20 | 25.16 | 1.52 | 11.74 | 34.31 | 52.33 | 8.99 | 12.91 | 66.45 | 7.72 | 68.97 | 58.80 | 29.90 | 18.40 | 0.98 | 105.38 |
| Aug-14 | 4.59 | 16.78 | 2.31 | 4.39 | 17.33 | 30.69 | 2.43 | 3.00 | 19.27 | 2.91 | 31.59 | 53.60 | 30.80 | 300.30 | 0.93 | 113.25 |
| Sep-14 | 5.34 | 12.31 | 0.84 | 12.07 | 12.27 | 23.83 | 9.15 | 5.37 | 22.36 | 2.00 | 29.25 | 56.20 | 32.30 | 173.30 | 0.79 | 108.29 |
| Oct-14 | 4.50 | 29.05 | 1.15 | 7.23 | 28.31 | 74.18 | 12.20 | 97.78 | 25.16 | 3.13 | 32.54 | 69.40 | 42.10 | 96.00 | 0.76 | 122.80 |
| Nov-14 | 4.73 | 29.18 | 1.48 | 12.10 | 49.68 | 288.75 | 18.96 | 102.07 | 41.48 | 5.30 | 39.46 | 61.90 | 36.90 | 65.50 | 0.69 | 130.94 |
| Dec-14 | 5.65 | 65.28 | 15.50 | 212.10 | 236.25 | 1142.76 | 73.14 | 193.06 | 224.50 | 31.39 | 28.56 | 107.40 | 67.60 | 3.50 | 0.66 | 148.51 |
| Jan-15 | 4.18 | 31.30 | 1.00 | 7.70 | 42.80 | 145.39 | 57.70 | 11.72 | 34.38 | 4.61 | 95.82 | 125.80 | 83.20 | 29.50 | 0.81 | 115.38 |
| Feb-15 | 5.01 | 38.19 | 6.58 | 28.13 | 53.87 | 367.89 | 36.14 | 11.98 | 87.31 | 23.49 | 20.27 | 89.00 | 64.00 | 15.80 | 0.80 | 122.83 |
| Mar-15 | 5.90 | 38.31 | 6.68 | 8.30 | 71.34 | 326.43 | 15.57 | 13.29 | 219.39 | 36.79 | 13.63 | 86.40 | 50.40 | 12.90 | 0.77 | 124.47 |
| Apr-15 | 6.23 | 21.67 | 1.91 | 10.97 | 31.37 | 106.76 | 36.99 | 8.58 | 70.90 | 11.66 | 87.87 | 68.20 | 37.90 | 83.30 | 1.05 | 115.26 |
| May-15 | 6.67 | 15.42 | 1.24 | 23.22 | 30.79 | 114.18 | 18.92 | 3.35 | 23.12 | 3.84 | 84.89 | 64.70 | 36.00 | 141.40 | 0.88 | 109.09 |

**Continued Table**

| Jun-15 | 6.04 | 14.47 | 0.72 | 20.98 | 31.27 | 96.72 | 44.50 | 2.62 | 12.05 | 1.77 | 83.22 | 50.90 | 28.00 | 224.20 | 0.66 | 115.59 |
| --- | --- | --- | --- | --- | --- | --- | --- | --- | --- | --- | --- | --- | --- | --- | --- | --- |
| Jul-15 | 5.46 | 15.15 | 0.15 | 2.92 | 14.09 | 57.66 | 0.93 | 8.18 | 31.68 | 4.75 | 59.26 | 54.90 | 31.40 | 152.80 | 0.83 | 97.40 |
| Aug-15 | 4.62 | 16.09 | 0.91 | 6.18 | 25.67 | 112.07 | 2.11 | 1.36 | 32.99 | 3.62 | 64.65 | 52.30 | 28.80 | 62.80 | 1.00 | 99.71 |
| Jun-15 | 6.04 | 14.47 | 0.72 | 20.98 | 31.27 | 96.72 | 44.50 | 2.62 | 12.05 | 1.77 | 83.22 | 50.90 | 28.00 | 224.20 | 0.66 | 115.59 |
| Jul-15 | 5.46 | 15.15 | 0.15 | 2.92 | 14.09 | 57.66 | 0.93 | 8.18 | 31.68 | 4.75 | 59.26 | 54.90 | 31.40 | 152.80 | 0.83 | 97.40 |
| Aug-15 | 4.62 | 16.09 | 0.91 | 6.18 | 25.67 | 112.07 | 2.11 | 1.36 | 32.99 | 3.62 | 64.65 | 52.30 | 28.80 | 62.80 | 1.00 | 99.71 |
| Jun-15 | 6.04 | 14.47 | 0.72 | 20.98 | 31.27 | 96.72 | 44.50 | 2.62 | 12.05 | 1.77 | 83.22 | 50.90 | 28.00 | 224.20 | 0.66 | 115.59 |
| Jul-15 | 5.46 | 15.15 | 0.15 | 2.92 | 14.09 | 57.66 | 0.93 | 8.18 | 31.68 | 4.75 | 59.26 | 54.90 | 31.40 | 152.80 | 0.83 | 97.40 |
| Sep-15 | 4.40 | 16.16 | 0.52 | 6.94 | 27.58 | 112.23 | 3.45 | 6.45 | 23.92 | 5.17 | 51.90 | 56.20 | 34.40 | 218.20 | 0.75 | 112.44 |
| Oct-15 | 5.63 | 23.45 | 0.86 | 10.71 | 22.31 | 160.52 | 5.98 | 2.78 | 35.19 | 7.64 | 107.54 | 76.50 | 45.70 | 78.90 | 0.77 | 112.42 |
| Nov-15 | 5.53 | 24.25 | 2.12 | 14.18 | 27.46 | 101.06 | 11.62 | 6.47 | 77.04 | 14.84 | 67.30 | 41.70 | 24.80 | 46.70 | 0.75 | 137.04 |
| Dec-15 | 5.93 | 62.73 | 14.24 | 14.78 | 50.78 | 527.63 | 6.67 | 14.75 | 69.53 | 10.58 | 279.09 | 78.80 | 49.90 | 14.60 | 0.74 | 142.42 |
